# Supplementary material for: Development of an Enzyme-Linked Immunosorbent Assay for Rapid Detection of Dengue Virus (DENV) NS1 and Differentiation of DENV Serotypes during Early Infection
Source: PubMed Central journal article supplement (PMC6595446; doi:10.1128/jcm.00221-19), 2019-06-25
Supplement: JCM.00221-19-s0001.pdf [file JCM.00221-19-s0001.pdf]

## 1 **Materials and methods**

2       **Preparation of NS1 proteins.** Cell culture supernatants of Vero cells infected  
3 with the four viruses (DENV1 Hawaii, DENV2 16681, DENV3 H87, and DENV4  
4 H241) were harvested after 5 d and inactivated by UV irradiation. To purify the  
5 soluble form of NS1 proteins (for each of the dengue serotypes) in the supernatant  
6 from each cell culture, we employed immunoaffinity chromatography columns in  
7 accordance with the manufacturer's instructions. This involved the use of anti-NS1  
8 monoclonal antibody D8-1 (flavivirus group-specific against NS1 proteins generated  
9 in our lab)(1), which had been immobilized onto a HiTrap<sup>TM</sup> NHS-activated HP  
10 column (GE Healthcare, Uppsala, Sweden). The column was equilibrated using five  
11 volumes of PBS before viral cell culture supernatants were passed over the  
12 immunoaffinity column to wash out unbound proteins using ten volumes of PBS.  
13 Bound NS1 was eluted using glycine solution (pH 2.8) before being buffered to  
14 neutral pH. The purified DENV NS1 proteins were then detected using commassie  
15 blue stained SDS-PAGE and Western blot analysis (in which mAb D8-1 was the  
16 primary antibody). The concentrations of NS1 proteins were measured using a Pierce  
17 BCA protein assay kit (Thermo Fisher Scientific, Illinois, USA).

18       **Generation and characterization of serotype-specific mAbs against**

19 **DENV1-4 NS1.** All experiments were performed using BALB/c mice purchased from  
20 the National Laboratory Animal Center and maintained at the Institute of Preventative  
21 Medicine's animal housing facility. All Animals were cared for in compliance with the  
22 Guideline for the Care and Use of Laboratory Animals (2010, Taiwan, R.O.C.) and  
23 experiments were reviewed and approved by the Institutional Animal Care and Use  
24 Committee or Panel of Institute of Preventive Medicine (IACUC no. AN-104-12,  
25 AN-105-05). For the first inoculation, four-week-old BALB/c mice were i.p.  
26 immunized with 15  $\mu$ g of immunoaffinity-purified NS1 proteins in complete Freund's  
27 adjuvant. The mice were then administered subsequent immunization boosts against  
28 their respective serotypes using 15  $\mu$ g of NS1 proteins in incomplete Freund's  
29 adjuvant. DENV antisera were obtained from the mice after consecutive challenges.  
30 Briefly, the spleens of immunized mice were removed and splenocytes were fused  
31 with NS1/1-Ab4-1 myeloma cells to generate hybridoma cells, which were selected in  
32 accordance with the standard procedures outlined by Kohler and Milstein (1975)(2).  
33 The fused cells were washed twice with RPMI and then mixed with 1 ml 50% (w/v)  
34 PEG 1500 (Roche, Penzberg, Germany) (which was gradually added over a period of  
35 1 min under gentle stirring) in a 15 ml conical tube. The mixture was then diluted  
36 twice through the slow (1 min) addition of 1 ml RPMI, followed by the slow addition

37 (2 min) of 8 ml serum-free RPMI. The mixture was subsequently centrifuged at 400g  
38 for 5 min. The fused cell pellet was re-suspended in RPMI supplemented with 20%  
39 FBS, HAT medium (Life technologies, Burlington, ONT Canada) and HFCS solution  
40 (Roche, Mannheim, Germany), and finally, the resuspension mixture was distributed in  
41 96-well plates (200 µl per well). Hybridoma cell lines that secreted specific antibodies  
42 against NS1 were identified via indirect ELISA (using purified DENV NS1 as the  
43 coating antigen for each serotype). Single clone cells were generated by limiting  
44 dilution. Western blotting analysis of lysates from C6/36 cells infected with DENVs  
45 was performed to determine (a) the specificity of anti-NS1 mAbs and (b) whether the  
46 epitopes recognized by the antibodies were conformational or linear. The mAbs were  
47 isotyped using a commercial mouse monoclonal antibody isotyping kit (IsoStrip™,  
48 Roche, Mannheim, Germany). The hybridoma cells were i.p. injected into  
49 pristane-primed BALB/c mice to induce ascitic fluid production. The mAbs were then  
50 purified from ascitic fluids using a protein G-sepharose column (HiTrap protein G,  
51 GE Healthcare, Uppsala, Sweden) in accordance with the manufacturer's instructions.

52 **HRP conjugation.** To conjugate mAbs with HRP (Innova Biosciences, Cambridge,  
53 UK), 100 µg of HRP and a 20 µl aliquot of modifier reagent were mixed with 200 µl  
54 of 1 mg/ml mAb. After incubating the mixture for 3 h at room temperature (20~25°C),

55 the reaction was stopped using a 20 µl aliquot of quencher. Following incubation for  
56 an additional 30 min at room temperature, 260 µl of glycerol was added, and the final  
57 solution was stored at -20°C. The final concentration of mAb-HRP was 400 µg/ml.

58 **Development of Dengue-type NS1 ELISA.** The development of Dengue-type  
59 NS1 ELISA involved selecting several serotype-specific and highly reactive mAbs  
60 based on the characteristics of anti-NS1 mAbs. Our objective was to determine (1) the  
61 sensitivity and specificity of each combination by testing HRP conjugated  
62 serotype-specific antibodies via pairing with serotype-cross-reactive mAb53-1.1 in a  
63 sandwich capture ELISA format, and (2) whether serotype-specific mAbs and  
64 serotype-cross-reactive mAb should be used as capture or detection antibodies. The  
65 tests were conducted using (a) serotype-specific mAbs as a detection antibody and  
66 cross-reactive mAb as a capture antibody or (b) serotype-specific mAbs as a capture  
67 antibody and cross-reactive mAb as a detection antibody. The serotype-cross-reactive  
68 mAb53-1.1 was selected as the optimal capture antibody for pairing with the four  
69 serotype-specific mAbs (mAb12-4.1, mAb33-7.1, mAb43-1.3, and mAb22-1.5) as  
70 detection antibodies for the assembly of Dengue-type NS1 ELISA. We determined the  
71 optimal experimental conditions for the coating and dilution of mAb-HRP using  
72 checkerboard titration. Briefly, 96-well plates (Nunc Immuno Maxisorp, Thermo,

73 Roskilde, Denmark) were coated with 100 µl of 10 µg /ml of mAb53-1.1 and  
74 incubated overnight at 4°C. The wells were subsequently blocked using blocking  
75 buffer (PBS, 0.05% Tween, 5% skim milk) at 37°C for 1 h and washed with wash  
76 buffer (PBS, 0.05% Tween). Viral culture supernatant or NS1 proteins were then  
77 serially diluted using blocking buffer and incubated at 37°C for 1 h. The plates were  
78 then washed before adding 100 µl of 0.8 µg/ml of serotype-specific mAb-HRP to  
79 undergo incubation again at 37°C for 1 h. Finally, the microwell plates were washed  
80 once again before adding 100 µl of TMB reagent to undergo incubation again at room  
81 temperature for 10 min. The reaction was stopped using 1 N sulfuric acid, whereupon  
82 the absorbance was read at 450 nm using a microplate autoreader.

### 83 **Supplemental References**

- 84 1. Chen L-K, Liao C-L, Lin C-G, Lai S-C, Liu C-I, Ma S-H, Huang Y-Y, Lin Y-L.  
85 1996. Persistence of Japanese Encephalitis Virus Is Associated with Abnormal  
86 Expression of the Nonstructural Protein NS1 in Host Cells. *Virology*  
87 217:220-229.
- 88 2. Kö Hler G, Milstein C. 1975. Continuous cultures of fused cells secreting  
89 antibody of predefined specificity. *Nature* 256:495.

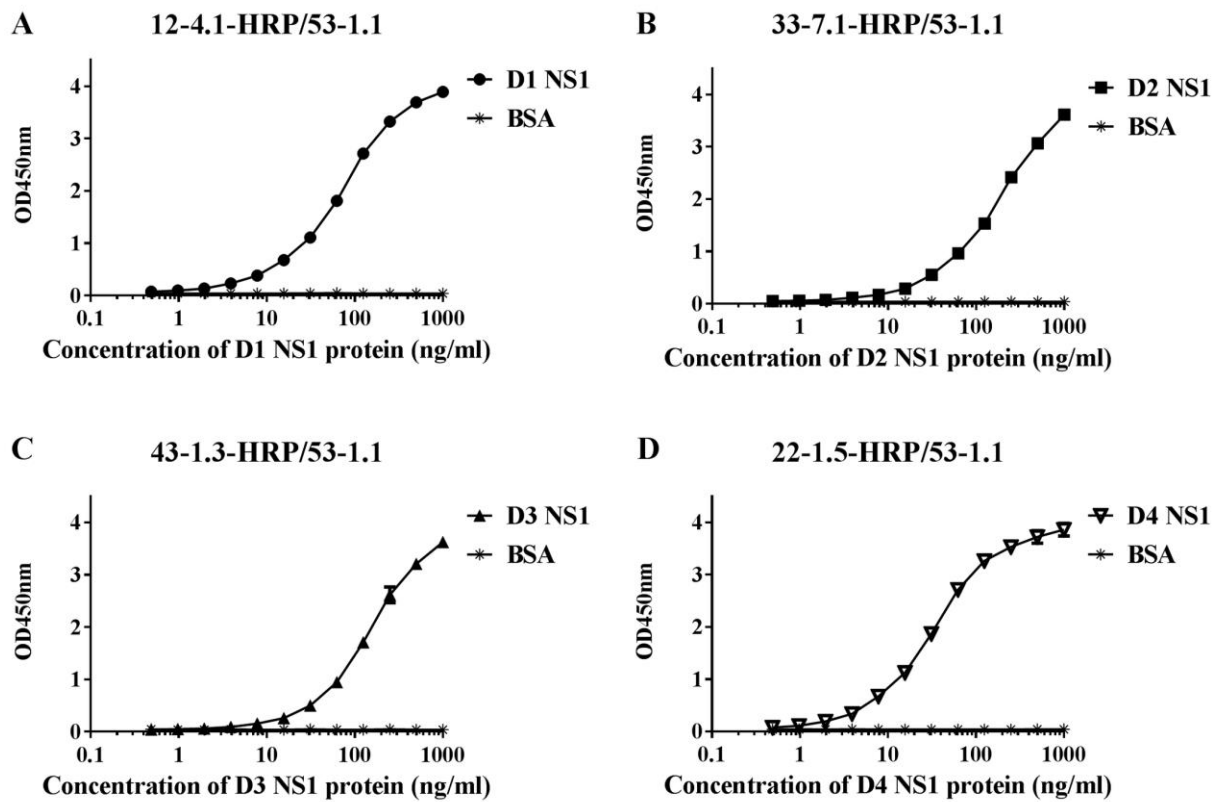

91

92 **Figure S1.** Standard curves illustrating the reactions between Dengue type NS1

93 ELISA and purified DENV NS1 proteins. The immunoaffinity-purified NS1 of each

94 DENV serotype was serially diluted 2-fold and analyzed (A-D); BSA was used to

95 establish a baseline for the assays. The minimum immunoaffinity-purified NS1

96 protein detection using these assays resulted in an OD450 value 2-fold higher than

97 BSA. Each data point represents the mean  $\pm$  SD of 3 replicated tests.

98
